# Supplementary material
Source: Research Square preprint supplement (doi:10.21203/rs.3.rs-9907183/v1)
Supplement: Supplementary file 1 [file dfdfd5c2887f202f1dd6c98c.pdf]

# SCPInt: an adversarial disentanglement-based explicit batch correction and integration method for MS-based single-cell proteomics

Yuzhi Sun<sup>1</sup>, Renjie Liu<sup>1,2</sup>, Jichong Mu<sup>1,2</sup>, Yachen Yao<sup>1</sup>, Liyuan Zhang<sup>1</sup>, Tianyi Zhao<sup>2,3,\*</sup>, Yadong Wang<sup>1,2,\*</sup>

## Supplementary Figures

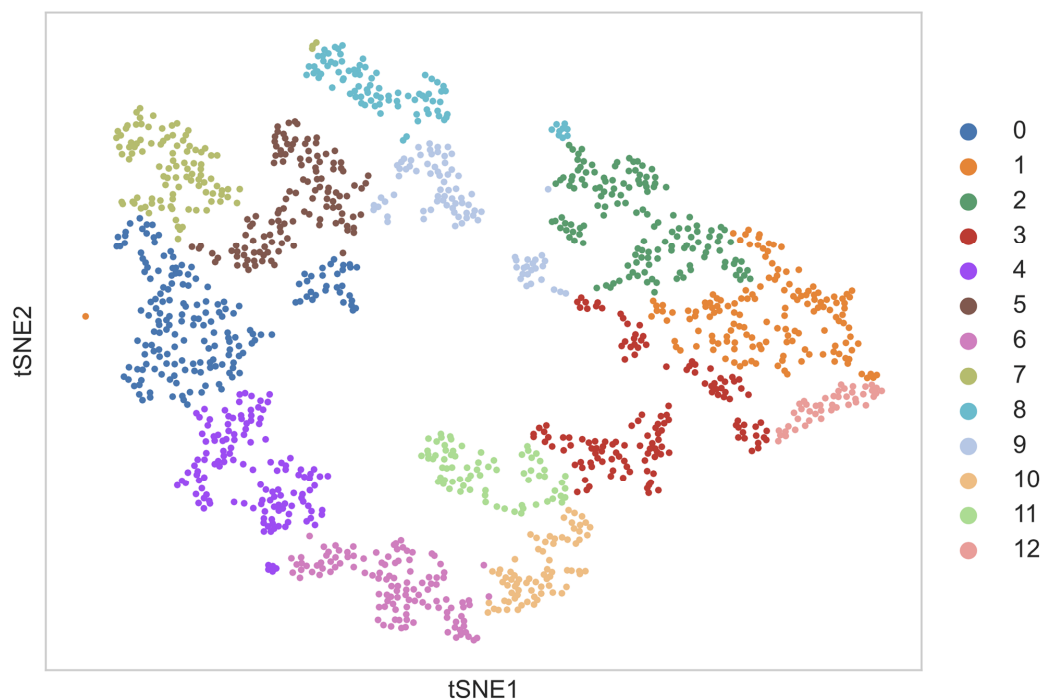

**Supplementary Figure 1.** Distribution of clusters identified by Leiden clustering after integrating Huffman and Specht datasets with SCPInt.

\* Corresponding authors: Tianyi Zhao ([zty2009@hit.edu.cn](mailto:zty2009@hit.edu.cn)), Yadong Wang ([ydwang@hit.edu.cn](mailto:ydwang@hit.edu.cn)).

1 Faculty of Computing, Harbin Institute of Technology, Harbin, China.

2 Harbin Institute of Technology Zhengzhou Research Institute, Zhengzhou, China.

3 School of Medicine and Health, Harbin Institute of Technology, Harbin, China.

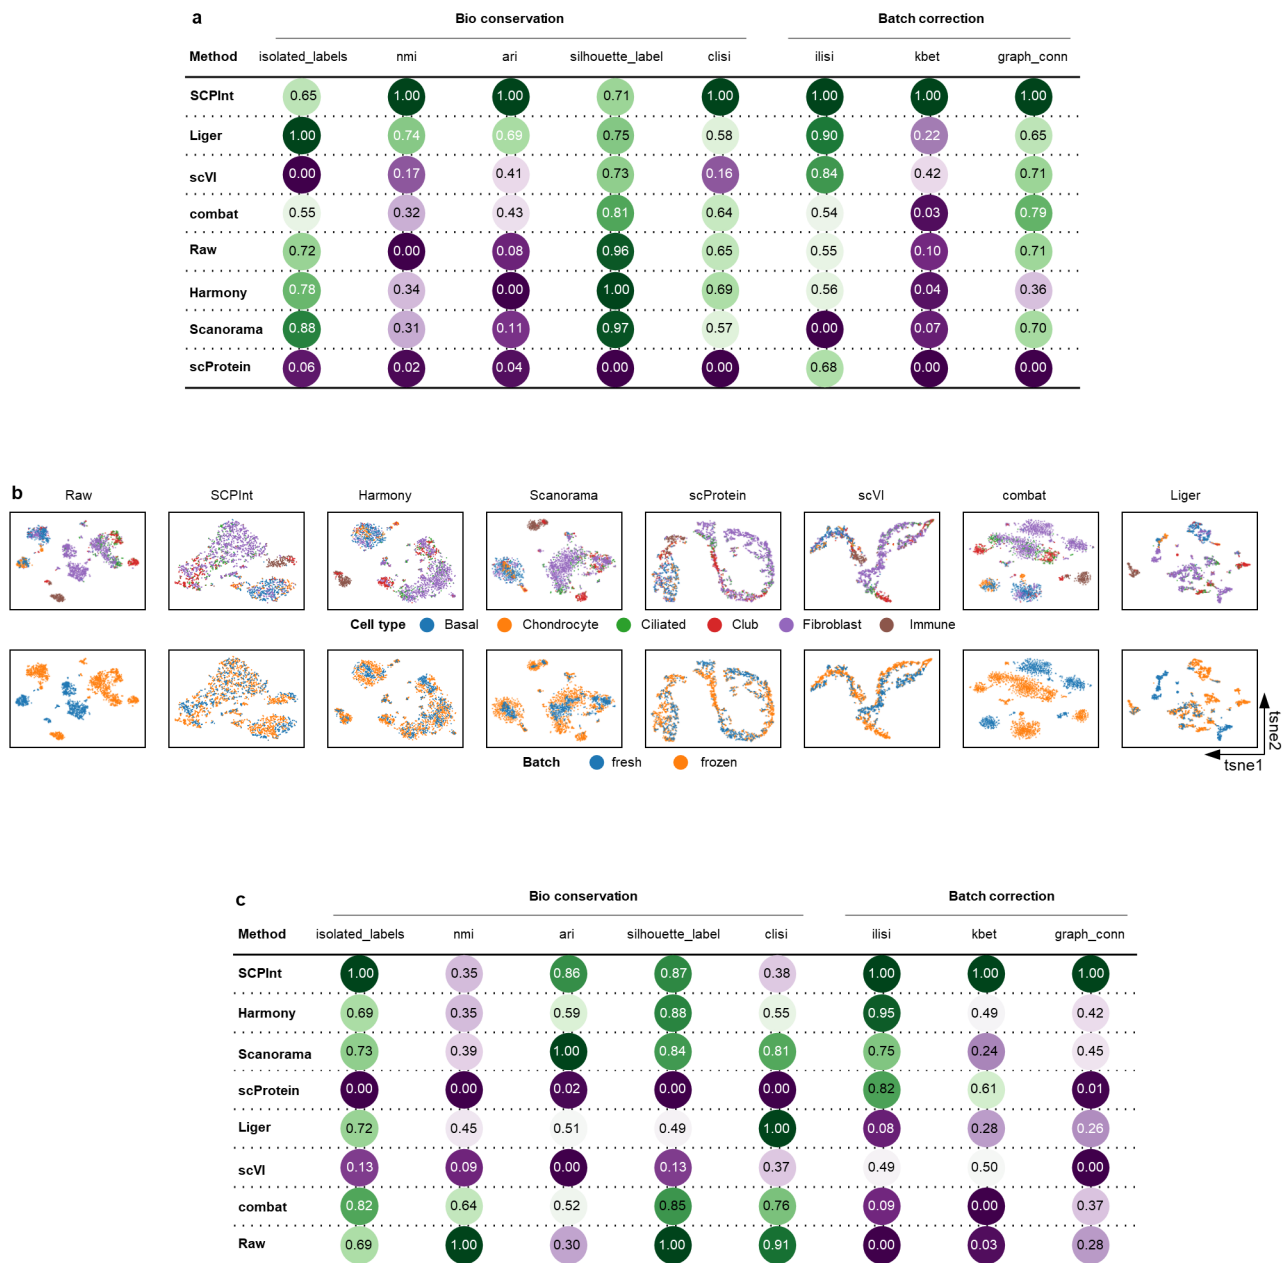

**Supplementary Figure 2. a.** Quantitative evaluation of biological conservation and batch-correction performance for SCPInt and comparative methods on Khan dataset. **b.** Scatter plots visualizing the integration results of SCPInt and comparison methods on the Leduc2024 dataset. **c.** Quantitative evaluation of biological conservation and batch-correction performance for SCPInt and comparative methods on Leduc2024 dataset.
